# Supplementary material for: In situ regulating aspect ratio of bamboo-like CNTs via CoxNi1−x-catalyzed growth to pursue superior microwave attenuation in X-band
Source: Royal Society of Chemistry journal article supplement (doi:10.1039/c8qi01102h), 2018-11-29
Supplement: c8qi01102h1.pdf [file c8qi01102h1.pdf]

## **Electronic Supplementary Information**

### **In-situ regulating aspect ratio of bamboo-like CNTs via $\text{Co}_x\text{Ni}_{1-x}$ catalyzed growth to pursue superior microwave attenuation in X-band**

*Yan Cheng, Jieming Cao, Hualiang Lv, Huanqin Zhao, Yue Zhao, Guangbin Ji \**

*College of Materials Science and Technology, Nanjing University of Aeronautics and Astronautics,*

*Nanjing 211100, P. R. China.*

Contact: E-mail: [gbbj@nuaa.edu.cn](mailto:gbbj@nuaa.edu.cn)

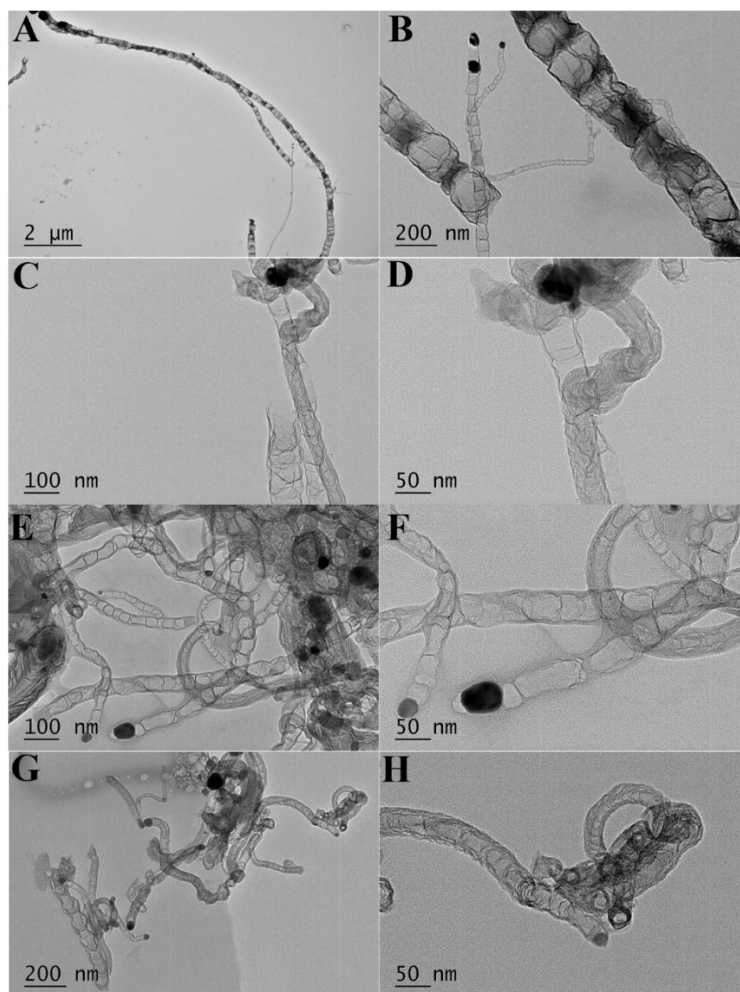

**Fig. S1** TEM images of (A, B) S1; (C, D) S2; (E, F) S4; (G, H) S5.

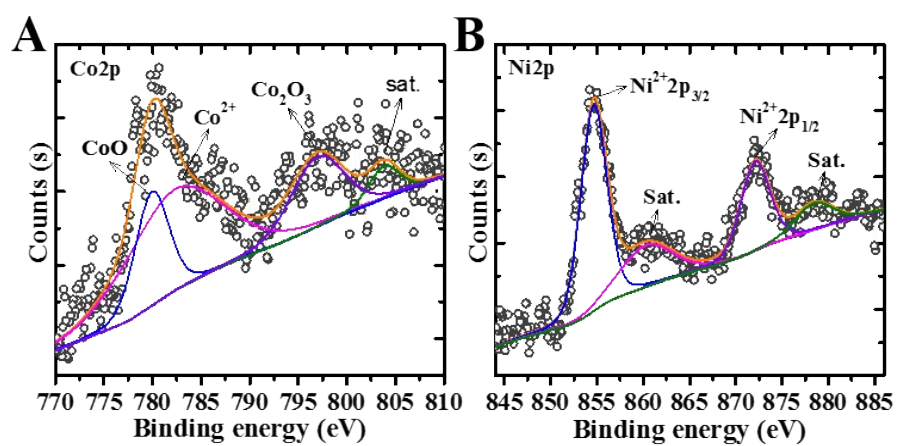

**Fig. S2** The split peaks of Co2p and Ni2p.

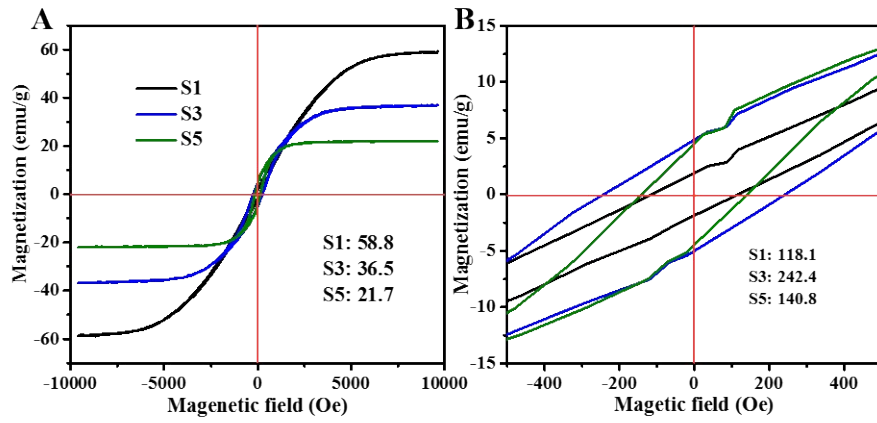

**Fig S3** (A) Hysteresis loops, (B) coercivity of S1, S3, S5.

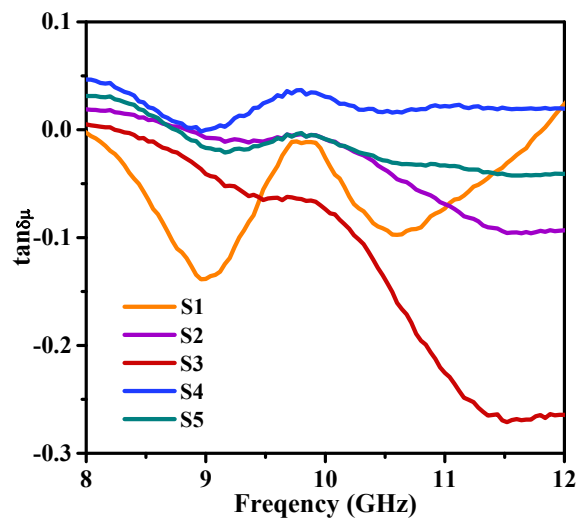

**Fig. S4** Magnetic loss factors of all samples.
